# Supplementary material for: Frequency of Detection and Phylogenetic Analysis of Porcine circovirus 3 (PCV-3) in Healthy Primiparous and Multiparous Sows and Their Mummified Fetuses and Stillborn
Source: PubMed Central journal article supplement (PMC7399965; doi:10.3390/pathogens9070533), 2020-07-02

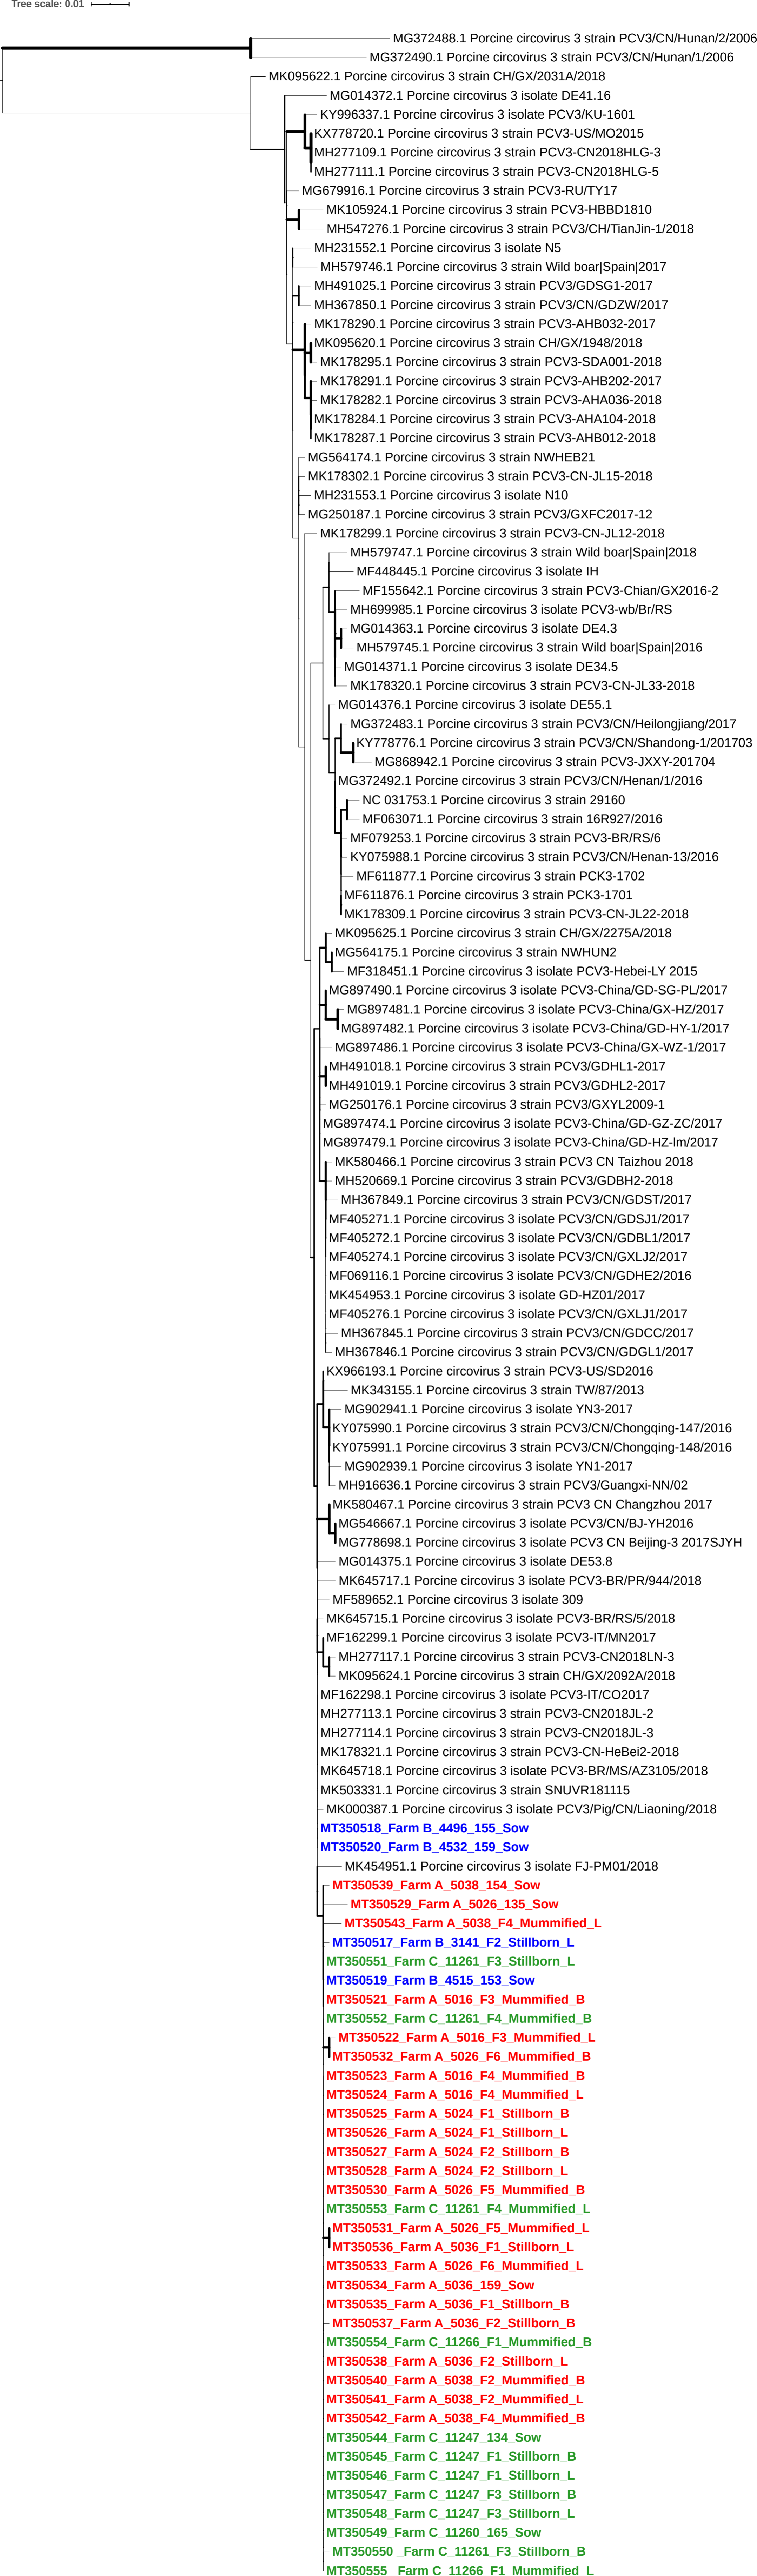

Tree scale: 0.01

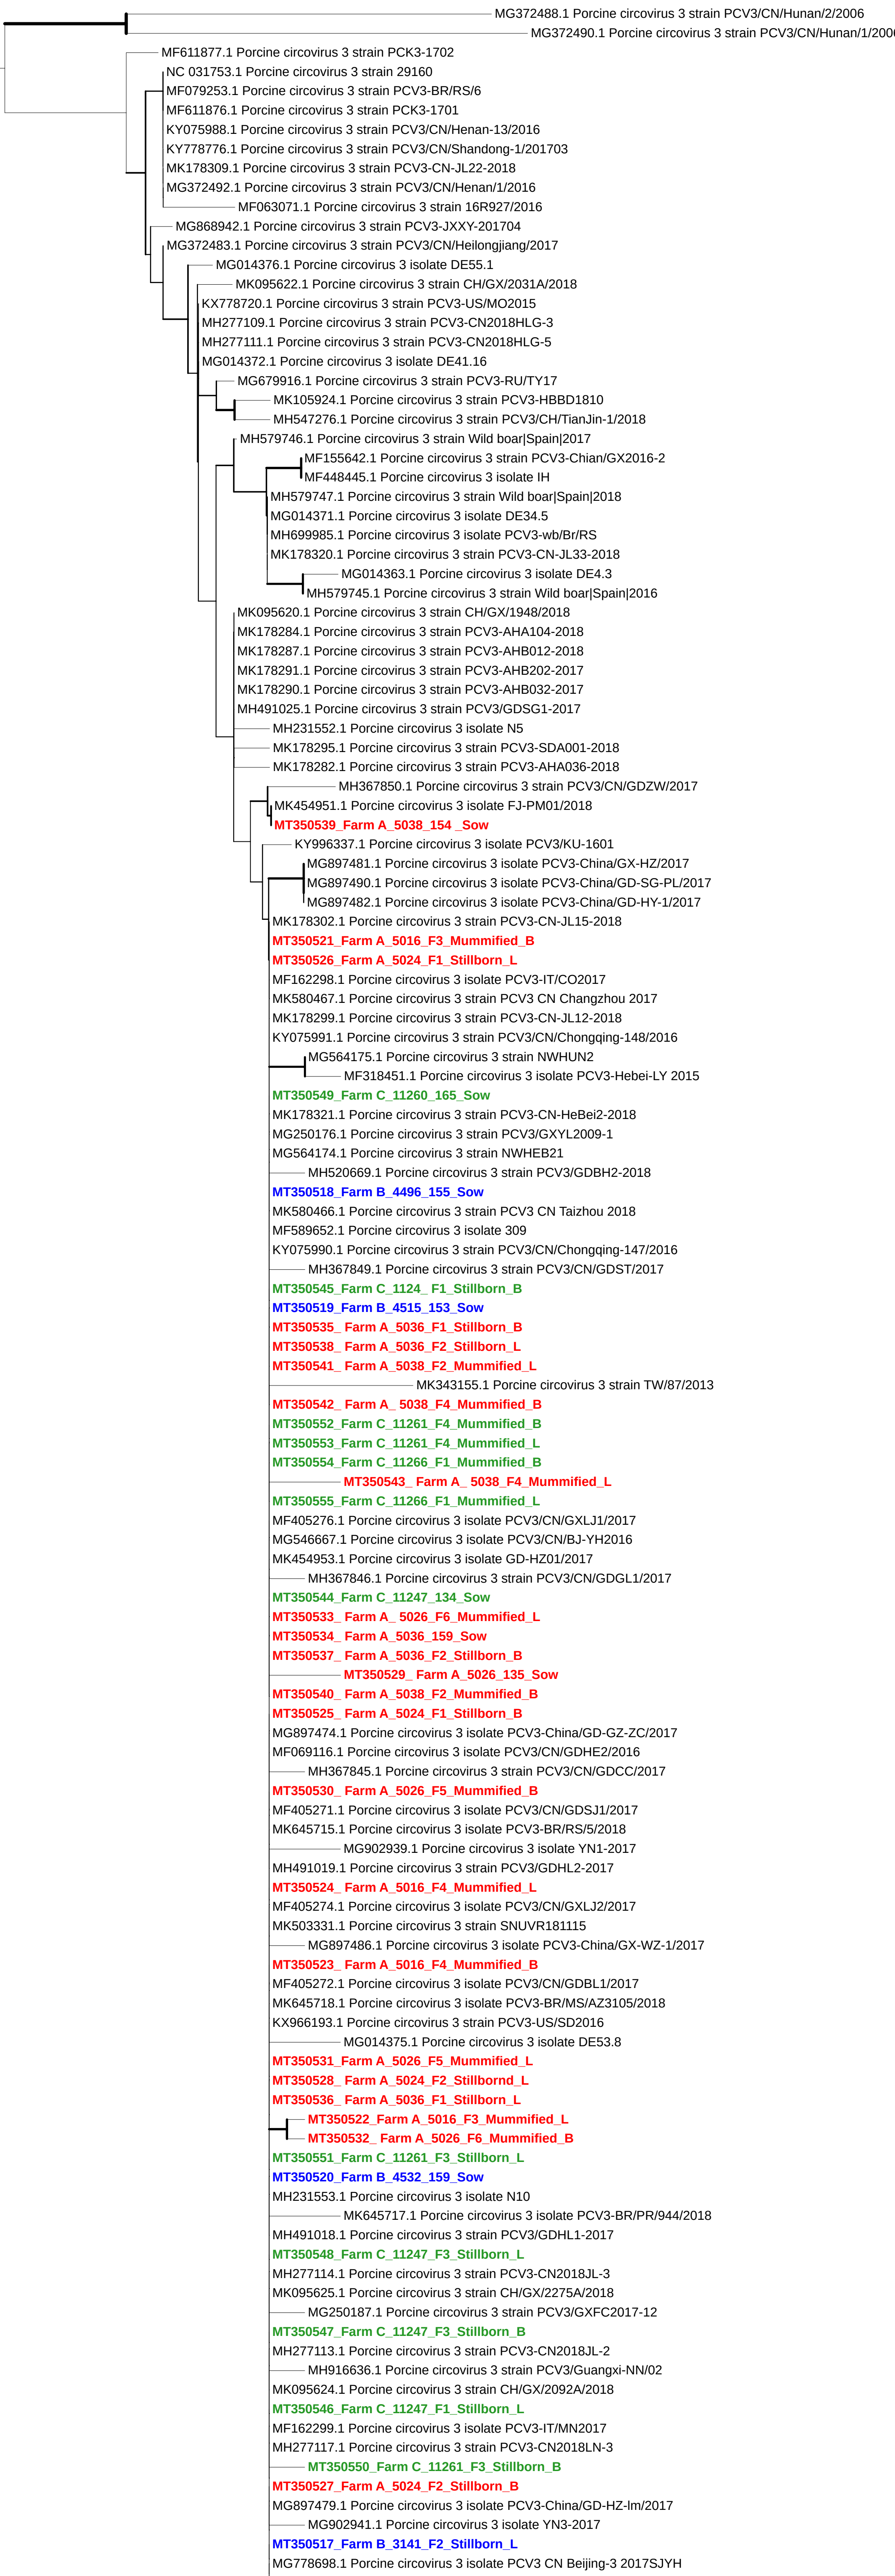

Supplement: pathogens-09-00533-s001.pdf [file pathogens-09-00533-s001.pdf]
